# Supplementary material for: The Absorption and Distribution of Heavy Metals of Dominant Plant for Ecological Restoration of Stone Coal Mine
Source: Hindawi journal article supplement (doi:10.1155/2021/4694528), 2021-01-01
Supplement: f1 [file 4694528.f1.docx]

**The Absorption and Distribution of Heavy Metals of Dominant Plant for Ecological Restoration of Stone Coal Mine**

**Lu Peng1,** **Shuang Luo****2, Lizhi Xiong1,*, Hailong Sun3,***

1 College of Biology and Environmental Sciences, Jishou University, Jishou, 416000, China;

2 College of Resources and Environment, Hunan Agricultural University, Changsha 410128, China;

3 State Key Laboratory of Hydraulics and Mountain River Engineering, Sichuan University, Chengdu, 610065, China.

*****Correspondence should be addressed to Lizhi Xiong; 913675863@qq and Hailong Sun; sunhl@scu.edu.cn.

**Supplementary Information**

Table of contents

| content | | page |
| --- | --- | --- |
| Text S1 | Substrate material used in ecological engineering | S1 |
| Text S2 | Community diversity | S1 |
| Text S3 | The main instrumental parameters and the internal standard element chosen | S2 |
| Table S1 | The composition of substrate material | S4 |
| Table S2 | The composition of seeds used in eco-engineering | S4 |
| Table S3 | The concentration multiples of heavy metals in different organs and control group | S5 |
| Figure S1 | The importance value (IV) of species in different position for herbosa and fruticeta community with the recovered times. (a), (b) and (c) were top, middle and bottom of slope, respectively. | S6 |
| Figure S2 | The Ma, H’ and D indexes of herbosa and fruticeta community with the recovered times | S7 |
| Figure S3 | The RDA ranking diagram of species importance values and heavy metals in substrate material. Solid arrows represent species information and hollow arrows represent environmental factors. The testing and stepwise selection method: summarize effects of explained variables and unrestricted permutations | S8 |
| References | | S9 |

**Text S1:** **Substrate material used in ecological engineering**

The substrate material was composed of a variety of material mixing, including soil, peat soil, sawdust, organic fertilizer, compound fertilizer, aggregate agent, water retention agent, bio-bacterial manure and seeds. The soil was sticky laterite or loess (particle size ≤0.5cm, water content ≤30%) without stones or gravel. The peat soil and sawdust were used to improve the soil structure and increase the content of organic matter, water conservation, prevent loss. The organic fertilizer is the product of pig manure fermentation (organic matter content ≥30%). The compound fertilizer could provide nitrogen, phosphorus and potassium for plant growth (China Agricultural Materials Group, N≥18%, P≥18%, K≥18%). The aggregate agent could improve soil structure and promote oxygen supply (provided by Hunan ZhiLan Ecological Environment Construction Co. LTD.). The soil water retention agent was anionic polyacrylamide (PAM) (Shanghai Wshine Chemical Co., Ltd., Shanghai, China, particle diameter 0.02 mm, the active ingredient concentration 99.9%). The bio-bacterial manure could accelerate the substrate material microbial life activities and improve the transformation of nutrients and plants to absorb nutrients.

**Text S2: Community diversity**

The importance value (IV) can reflect the position and function of plants in the community and been used to compare the importance of a species in the community between different communities [[1](#_ENREF_1)]. The IV value of species was calculated by relative density, relative coverage and relative height in this study.

(SI 1)

In the formula, the density= Number of individuals / area of the sample, the area of the quadrat = the density of one species / total specie density; the cover is the percentage of plot area beneath the canopy of a given species, the relative cover = the cover of a species / total specie cover; the relative height = the average height of a species / the total average height of all species[[2](#_ENREF_2)].

The community *α* diversity indexes, Margalef (*M*a), Shannon-Wiener (*H*’), Simpson index (*D*), were calculated by the number of species (S), the sum of the number of individuals of all species (N) and the IV of the specie *i* (P*i*).

Margalef index： (SI 2)

Shannon-Wiener index： (SI 3)

Simpson index： (SI 4)

*Ma*, *H*’ and *D* focused on species richness, species number and the change of population, respectively, their values comprehensively reflect species richness, community succession, and anti-jamming capability [[3](#_ENREF_3)].

**Text 3: The main instrumental parameters and the internal standard element chosen**

The main instrumental parameters were shown in Table.

Table: Instrumental Parameters of ICP-MS

| NexION 350 X | Parameters |
| --- | --- |
| RF power/w | 1600 |
| Nebulizer Gas Flows/L/min | 0.9 |
| Auxiliary Gas Flows/L/min | 1.2 |
| Plasma Gas Flows/L/min | 18 |
| He Gas Flows/L/min | 3.8 |
| Nebulizer | Concentric nebulizer |
| Sampling cone | Nickel Skimmer |
| Replications | 3 |
| Element isotope：208 Pb,111Cd,52Cr,75 As,63 Cu,66 Zn,60 Ni, 121 Sb,55 Mn,51 V | |
| Internal standard element: 72Ge, 103Rh, 187Re | |

The collision/reaction cell (CRC) of ICP-MS was used to correct the interference of carbon and chloride (e.g. 40Ar12C+, 35Cl16O1 H+ and 40Ar35Cl+) in quantification of 52Cr and 75As. To avoid the instrumental drift of ICP-MS and matrix effect of samples, the 72Ge was chosen as the internal standard element of 52Cr, 75 As, 63 Cu, 66 Zn, 60 Ni, 55 Mn and 51 V, and the 103Rh was chosen as the internal standard element of 111Cd and 121 Sb. Moreover, the 187Re was chosen as the internal standard element of 208 Pb.

**Table S1. The composition of substrate material**

| **species** | mass ratio % |
| --- | --- |
| soil | 65 |
| peat soil | 15 |
| sawdust | 7.5 |
| organic fertilizer | 7.5 |
| compound fertilizer | 1.5 |
| aggregate agent | 1 |
| soil water retention agent | 0.5 |
| bio-bacterial manure | 1 |
| seed | 10.5 |

**Table S2. The composition of seeds used in eco-engineering**

| Types | Species | Thousand kernel weight (g) | Germination rate (%) | Seeds clarity (%) | Expected density (number of specie/m2) | Dosage (g/m2) |
| --- | --- | --- | --- | --- | --- | --- |
| herbosa | *Cynodon dactylon* (L.) Pers. | 5-7 | 62.3±9.2% | 86.3% | 50 | 0.2 |
| *Lolium perenne* L. | 1.5-1.8 | 51.4±5.8% | 87.50% | 250 | 0.5 |
| *Carex siderosticta* Hance | 0.5 | 62.6±9.7% | 72.8% | 200 | 0.5 |
| fruticeta | *Robinia pseudoacacia* L. | 22.5 | 45.6±10.4% | 82.10% | 5 | 1.0 |
| *Indigofera amblyantha*Craib | 9.1 | 63.8±14.5% | 74.50% | 10 | 0.75 |
| *Rhus chinensis* Mill. | 13 | 40.8±8.5% | 75.50% | 5 | 0.7 |
| *Cassia surattensis* Burm. | 28.7 | 46.4±9.2% | 81.80% | 10 | 2.2 |
| *Crotalaria pallida* Ait. | 16 | 42.5±9.6% | 75.60% | 10 | 3.2 |

* The seed dosage was calculated according to the expected plant density and germination percentage and clarity. The seeds of plants mixing in the substrate material were sprayed onto the rocky slope.

**Table S3. The concentration multiples of heavy metals in different organs and control group.**

| heavy metals | stem | | leaf | root |
| --- | --- | --- | --- | --- |
| xylem | phloem |
| Pb | 1.25 | **4.18** | 1.38 | 1.69 |
| Cd | **1.88** | 0.87 | 1.26 | 0.70 |
| Cr | 1.28 | 2.18 | **2.63** | 2.05 |
| As | 2.62 | **4.28** | 1.00 | 2.20 |
| Cu | 1.42 | 1.75 | **1.94** | 1.01 |
| Zn | **2.74** | 1.18 | 1.11 | 0.96 |
| Ni | 1.84 | 0.98 | **2.78** | 1.56 |
| Sb | 1.67 | 1.75 | 1.88 | **2.11** |
| Mn | 2.62 | 2.15 | **3.62** | 1.12 |
| V | **1.71** | 1.64 | 1.11 | 1.05 |

Figure S1. The importance value (IV) of species in different position for herbosa and fruticeta community with the recovered times. (a), (b) and (c) were top, middle and bottom of slope, respectively.

Figure S2. The *Ma*, *H*’ and *D* indexes of herbosa and fruticeta community with the recovered times

Figure S3. The RDA ranking diagram of species importance values and heavy metals in substrate material. Solid arrows represent species information and hollow arrows represent environmental factors. The testing and stepwise selection method: summarize effects of explained variables and unrestricted permutations.

**References**

[1] Jan Lepš, Valerie K Brown, Tomas A Diaz Len, Dagmar Gormsen, Katarina Hedlund, Jana Kailová, Gerard W Korthals, Simon R Mortimer, Claudino Rodriguez‐Barrueco, Jacques Roy. Separating the chance effect from other diversity effects in the functioning of plant communities[J]. Oikos, 2001, 92(1): 123-134.

[2] Ak Bhadra, Sk Pattanayak. Dominance is more justified than Abundance to calculate Importance Value Index (IVI) of plant species[J]. Asian Journal of Science and Technology, 2017, 8(2): 4304-4326.

[3] Ricardo A Rodríguez, Ada M Herrera, Rodrigo Riera, Jacobo Santander, Jezahel V Miranda, ngel Quirós, María J Fernández-Rodríguez, José M Fernández-Palacios, Rüdiger Otto, Carlos G Escudero. Distribution of species diversity values: a link between classical and quantum mechanics in ecology[J]. Ecological Modelling, 2015, 313: 162-180.
